# Supplementary material
Source: Springer Nature journal article supplement (https://www.springermedizin.de/resource/supplementary/12985_2010_1043_MOESM3_ESM.pdf/9609014)

**A.**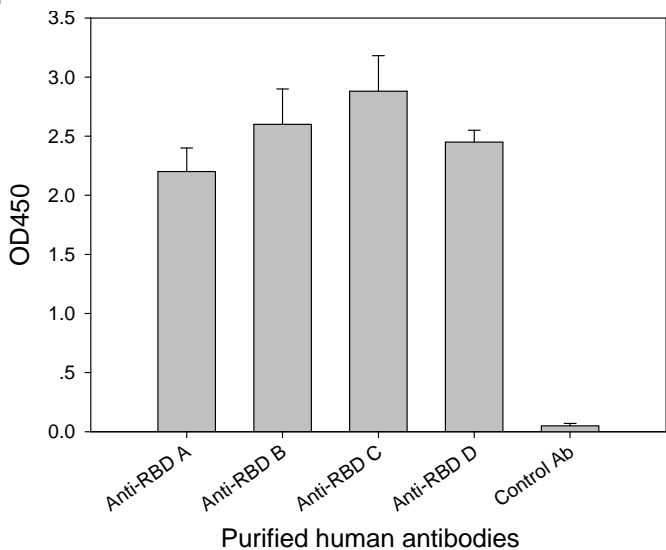**B.**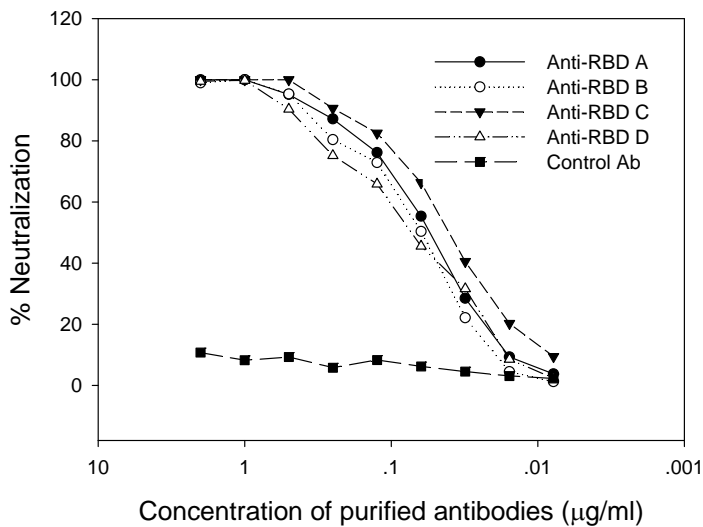

Supplement: MOESM3 [file 9609014]
